# Supplementary material for: Dissecting the precise role of H3K9 methylation in crosstalk with DNA maintenance methylation in mammals
Source: PubMed Central journal article supplement (PMC5426519; doi:10.1038/ncomms12464), 2016-08-24
Supplement: ncomms12464-s1.pdf [file ncomms12464-s1.pdf]

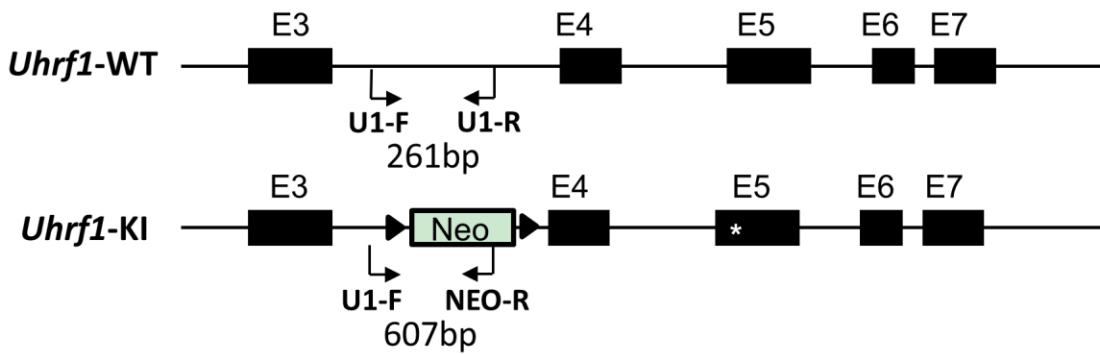

\* TATCCA → GCTGCA(YP187/188AA)

U1-F:GTGGCAGTATAGATTCTCACC

U1-R:CTACCTGGCAGCAAAGC

NEO-R:TATCGCCTTCTTGACGAGTTC

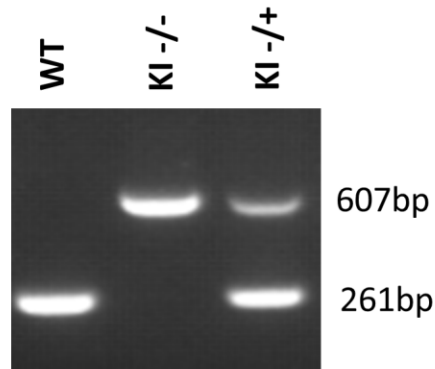

**Supplementary Figure 1. Strategy for genotyping of Uhrf1 YP187/188AA KI mice by PCR.** The top panel illustrates the genomic difference between WT and KI mice. The middle panel shows the primer sequences for PCR reaction. The lower panel shows a representative genotyping result for WT, homozygous KI  $-/-$  and heterozygous KI  $-/+$  mouse.

**Figure 1C**

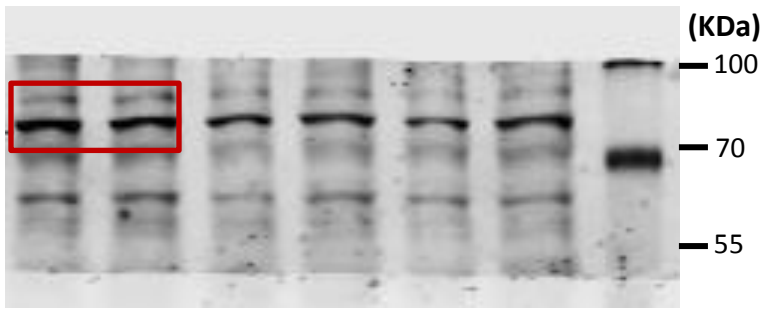

$\alpha$ Uhrf1

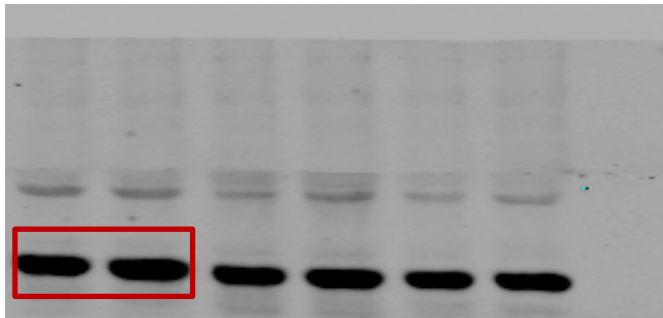

$\alpha$ GAPDH

**Figure 1D**

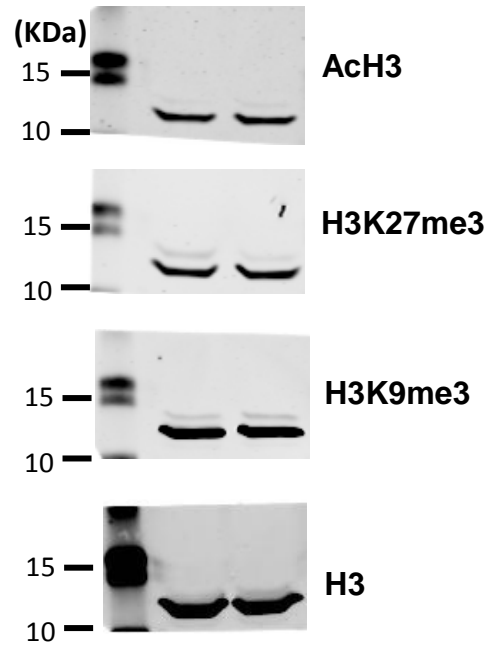

**Figure 1E**

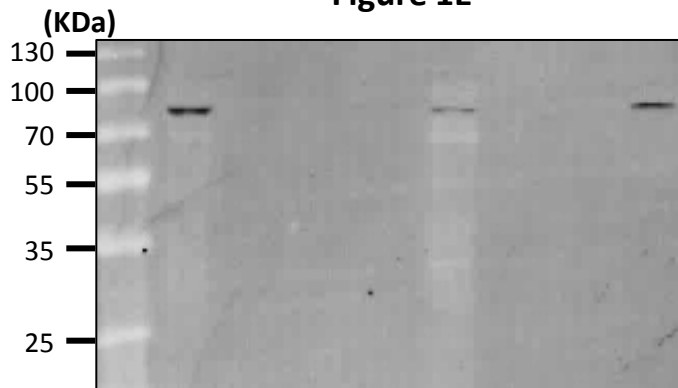

$\alpha$ Uhrf1

**Supplementary Figure 2. Whole uncropped Western blots for Figure 1C, 1D and 1E.** Molecular weight markers are as indicated. Labeling and order are consistent with Figure 1.

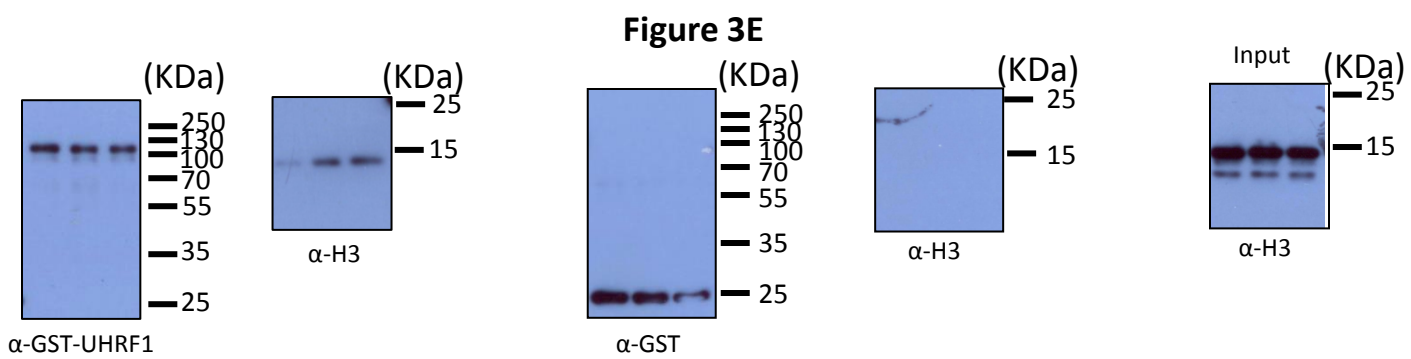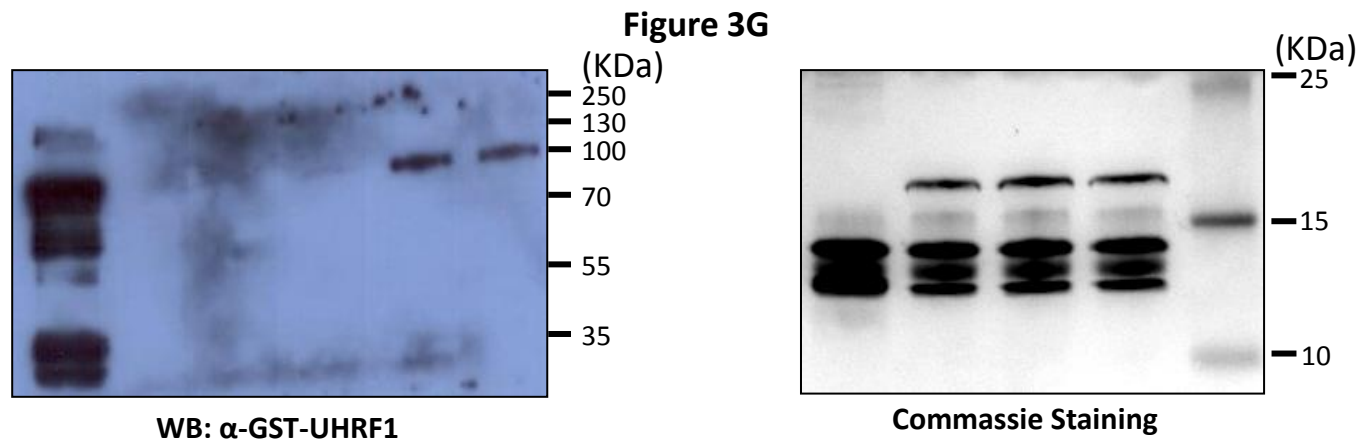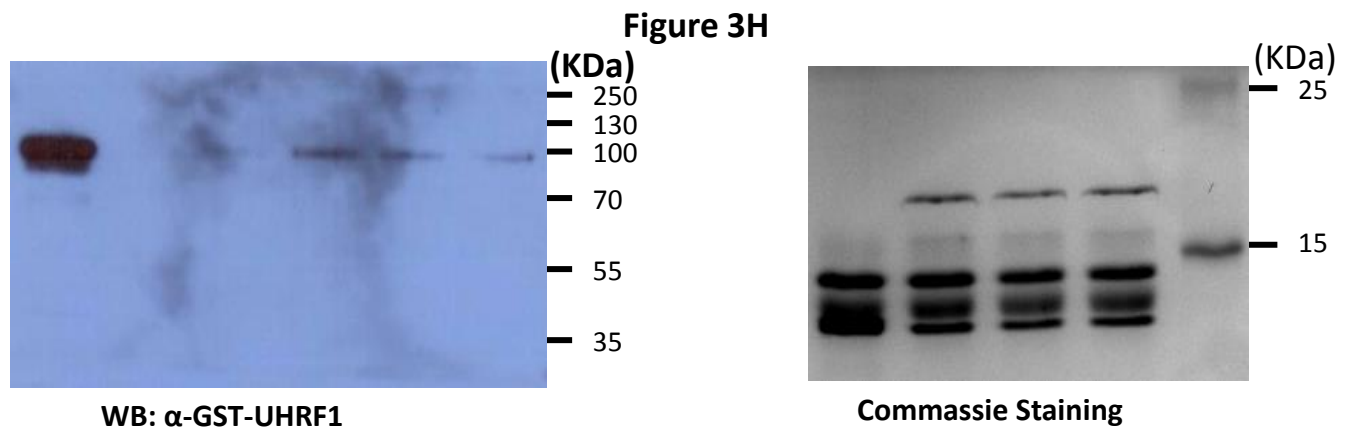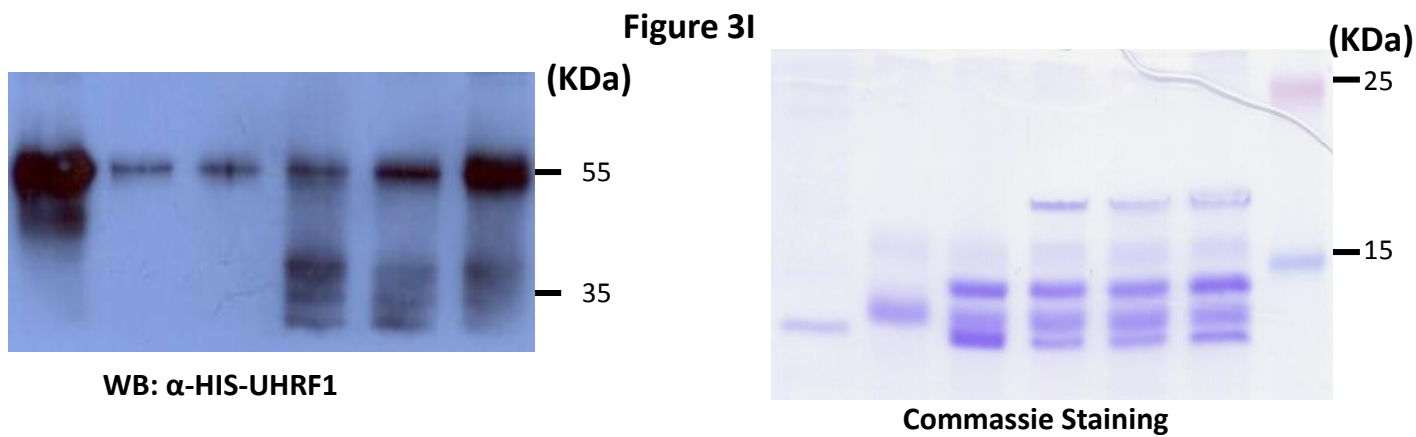

**Supplementary Figure 3. Whole uncropped Western blots for Figure 3.** Molecular weight markers are as indicated. Labeling and order are consistent with Figure 3.

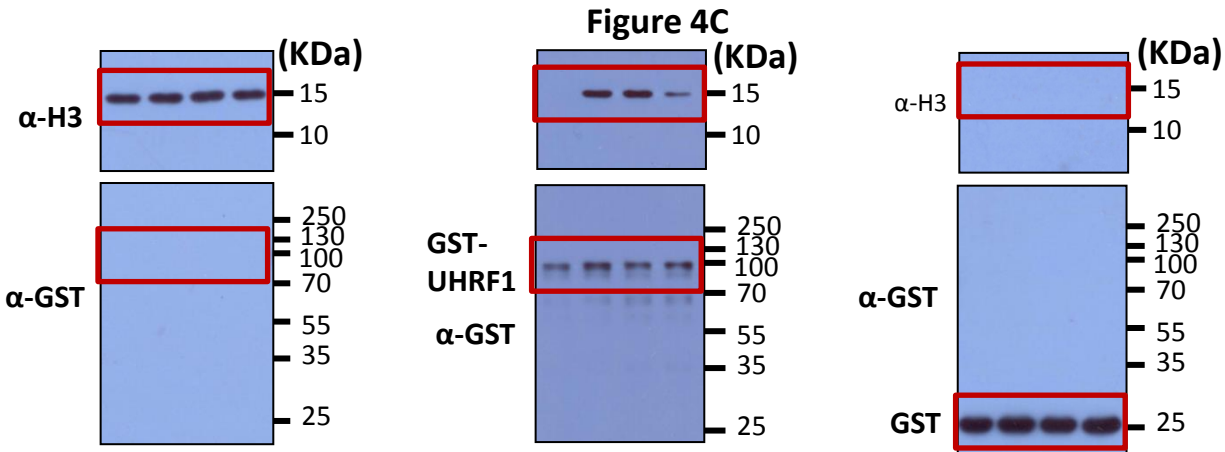

**Figure 4D**

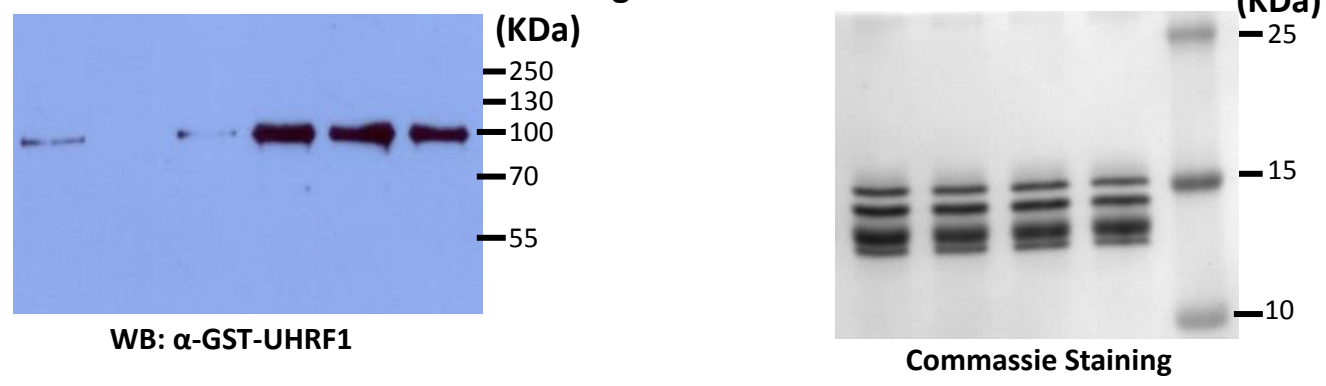

**Figure 4E**

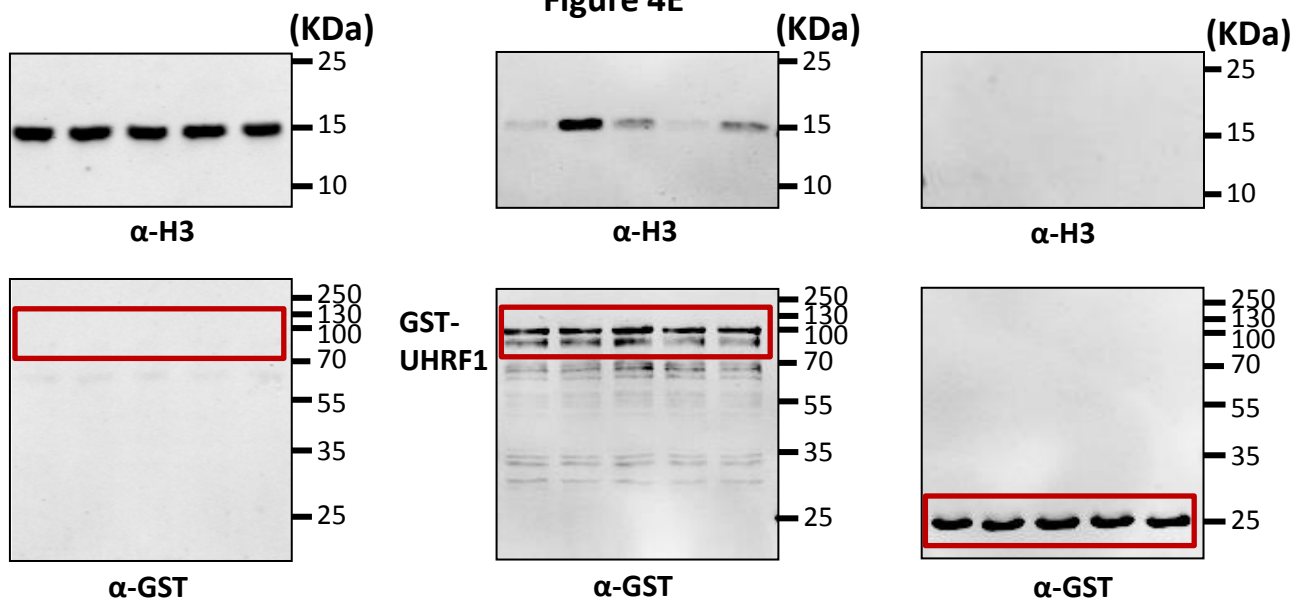

**Supplementary Figure 4. Whole uncropped Western blots for Figure 4. Molecular weight markers are as indicated. Labeling and order are consistent with Figure 4.**

**Figure 5B**

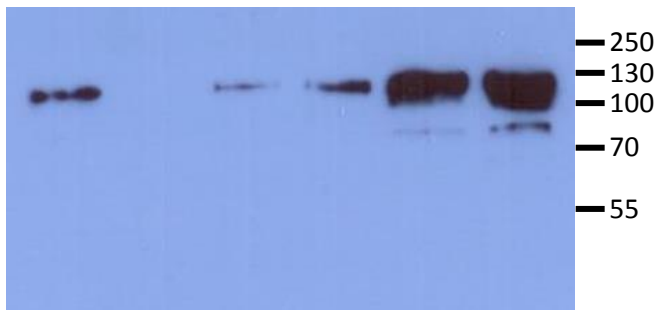

WB:  $\alpha$ -GST-UHRF1

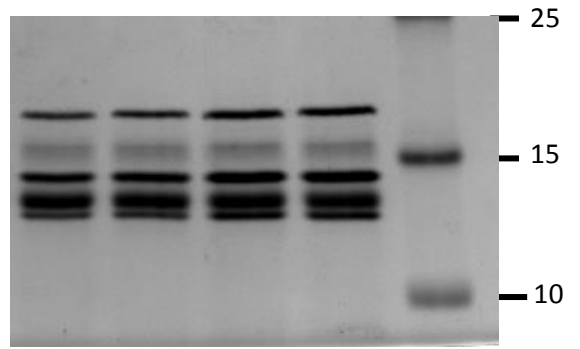

Commassie Staining

**Figure 5D**

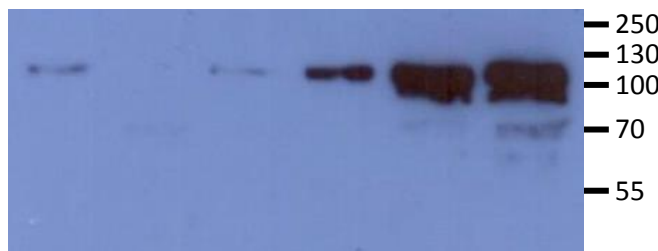

WB:  $\alpha$ -GST-UHRF1

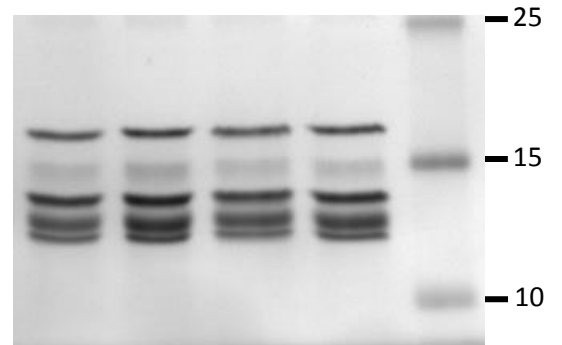

Commassie Staining

**Figure 5F**

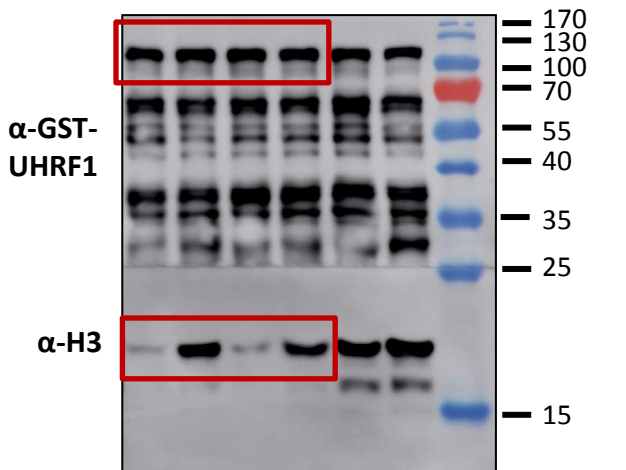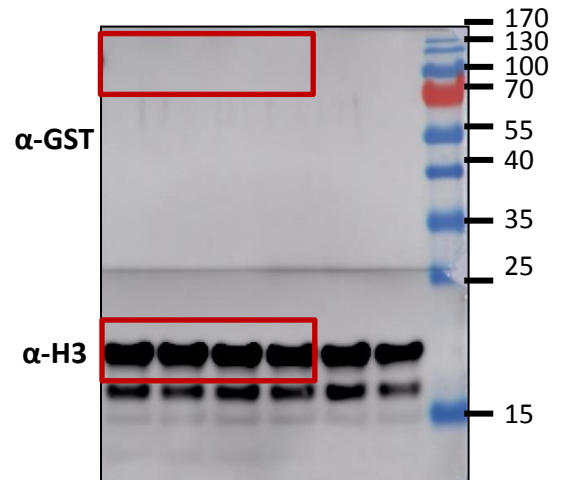

**Supplementary Figure 5. Whole uncropped Western blots for Figure 5.** Molecular weight markers are as indicated. Labeling and order are consistent with Figure 5.
